# Supplementary material for: Non-derivatizing solvent assisted waste-derived cellulose/ MOF composite porous matrix for efficient metal ion removal: comprehensive analysis of batch and continuous packed-bed column sorption studies
Source: Royal Society of Chemistry journal article supplement (doi:10.1039/d4ra02566k), 2024-01-01
Supplement: d4ra02566k1.pdf [file d4ra02566k1.pdf]

## **Batch and Continuous Packed-Bed Column Sorption of Metal Ions using Economically Derived Ca-MOF Immobilized Cellulose Porous Matrix**

**Anil Kumar K<sup>a</sup>, Mohan Jujaru<sup>a</sup>, Jitendra Panwar<sup>b</sup>, and Suresh Gupta<sup>a\*</sup>**

<sup>a</sup>Department of Chemical Engineering, Birla Institute of Technology and Science, Pilani 333 031, India.

<sup>b</sup>Department of Biological Sciences, Birla Institute of Technology and Science, Pilani 333 031, India.

\* Corresponding author.

*E-mail address:* sureshg@pilani.bits-pilani.ac.in (S. Gupta)

## Supplementary file

**Table S1** Different isotherms and kinetic models were used to fit the sorption equilibrium and kinetic data.

|                 | Non-linear Equations                                    | Model parameters                                                                                                                           | Other variables                                                                                                                                                                                                                                                          |
|-----------------|---------------------------------------------------------|--------------------------------------------------------------------------------------------------------------------------------------------|--------------------------------------------------------------------------------------------------------------------------------------------------------------------------------------------------------------------------------------------------------------------------|
| Isotherm models |                                                         |                                                                                                                                            |                                                                                                                                                                                                                                                                          |
| Langmuir        | $\theta = \frac{q_e}{q_m} = \frac{bC_e}{1 + bC_e}$      | $q_m$ , monolayer sorption capacity mg g <sup>-1</sup> .<br>$b$ , affinity of union sites.                                                 | $\theta$ , fractional coverage.<br>$C_e$ , equilibrium concentration of solute in the solution mg L <sup>-1</sup> .<br>$q_e$ , equilibrium sorption capacity mg g <sup>-1</sup> .<br><br>$R_L$ , is a separation factor<br>$C_o$ , maximum concentration at equilibrium. |
|                 | <u>Sub Eq.</u><br>$R_L = \frac{1}{1 + bC_0}$            |                                                                                                                                            |                                                                                                                                                                                                                                                                          |
| Freundlich      | $q_e = K_f C_e^{\frac{1}{n}}$                           | $K_f$ , sorption capacity related to bond energy (mg g <sup>-1</sup> ) (L mg <sup>-1</sup> ) <sup>1/n</sup> .<br>$n$ , sorption intensity. | $q_e$ , equilibrium adsorption capacity mg g <sup>-1</sup> .<br>$C_e$ , equilibrium concentration mg L <sup>-1</sup> .                                                                                                                                                   |
| Temkin          | $q_e = \frac{RT}{b_T} \ln (A_T C_e)$                    | $A_T$ , equilibrium binding constant.<br>$b_T$ , Temkin constant.                                                                          | $T$ , absolute temperature K.<br>$R$ , universal gas constant, 8.314 J mol <sup>-1</sup> K <sup>-1</sup> .<br><br>$B$ , constant related to heat of adsorption J mol <sup>-1</sup> .                                                                                     |
|                 | <u>Sub Eq.</u><br>$B = RT/b_T$                          |                                                                                                                                            |                                                                                                                                                                                                                                                                          |
| D-R             | $q_e = q_m \exp (-K\varepsilon^2)$<br><br><u>Where;</u> | $K$ , D-R constant mol <sup>-2</sup> K <sup>-1</sup> J <sup>-2</sup> .<br>$q_m$ , monolayer sorption capacity mg g <sup>-1</sup> .         | $C_e$ , equilibrium concentration mg L <sup>-1</sup> .<br>$T$ , absolute temperature K.<br>$R$ , universal gas constant, 8.314 J mol <sup>-1</sup> K <sup>-1</sup> .                                                                                                     |

|                       |                                                           |                                                                                                                                                |                                                            |
|-----------------------|-----------------------------------------------------------|------------------------------------------------------------------------------------------------------------------------------------------------|------------------------------------------------------------|
|                       | $\varepsilon = RT * \ln \left( 1 + \frac{1}{C_e} \right)$ |                                                                                                                                                | $E$ , mean free energy kJ mol <sup>-1</sup> .              |
|                       | <u>Sub Eq.</u><br>$E = \frac{1}{(2K)^{\frac{1}{2}}}$      |                                                                                                                                                |                                                            |
| <b>Kinetic models</b> |                                                           |                                                                                                                                                |                                                            |
| Pseudo-first order    | $q_t = q_e \left( 1 - e^{-k_1 t} \right)$                 | $q_e$ , equilibrium sorption capacity mg g <sup>-1</sup> .<br>$k_1$ , pseudo-first-order rate constant min <sup>-1</sup> .                     | $q_t$ , sorption capacity at time 't' mg g <sup>-1</sup> . |
| Pseudo- second-order  | $q_t = \frac{q_e^2 k_2 t}{1 + q_e k_2 t}$                 | $q_e$ , equilibrium sorption capacity mg g <sup>-1</sup> .<br>$k_2$ , pseudo-second-order rate constant g mg <sup>-1</sup> min <sup>-1</sup> . | $q_t$ , sorption capacity at time 't' mg g <sup>-1</sup> . |

**Table S2** Predicted breakthrough points from the constants of the BDST model for different influent concentrations ( $Q$ : 5 mL min<sup>-1</sup>,  $Z$ : 20 cm).

| $C_i/C_0$ | $a$ (min cm <sup>-1</sup> ) | $b$ (min) | 300 mg L <sup>-1</sup>       |            |                          |                         | $E$ (%) |
|-----------|-----------------------------|-----------|------------------------------|------------|--------------------------|-------------------------|---------|
|           |                             |           | $a'$ (min cm <sup>-1</sup> ) | $b'$ (min) | $t_{\text{pred.}}$ (min) | $t_{\text{exp.}}$ (min) |         |
| 0.01      | 31                          | 300       | 51.66                        | 118.51     | 914.81                   | 530                     | 72.60   |
| 0.1       | 38                          | 300       | 63.33                        | 145.28     | 1121.38                  | 1440                    | -22.12  |
| 0.5       | 60                          | 270       | 100.00                       | 229.39     | 1770.61                  | 2400                    | -26.22  |
| 0.9       | 69                          | 200       | 115.00                       | 263.79     | 2036.20                  | 3140                    | -35.15  |

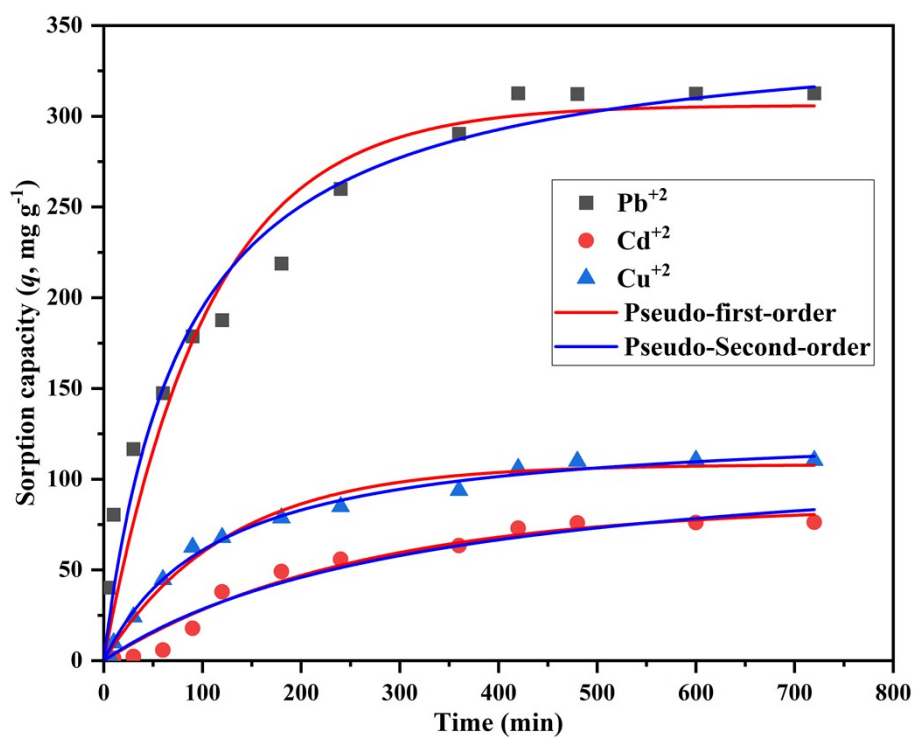

**Fig. S1** Applicability of kinetic models for the sorption of (a) Pb<sup>2+</sup>, (b) Cd<sup>2+</sup>, and (c) Cu<sup>2+</sup> ions using Ca-MOF-CB.

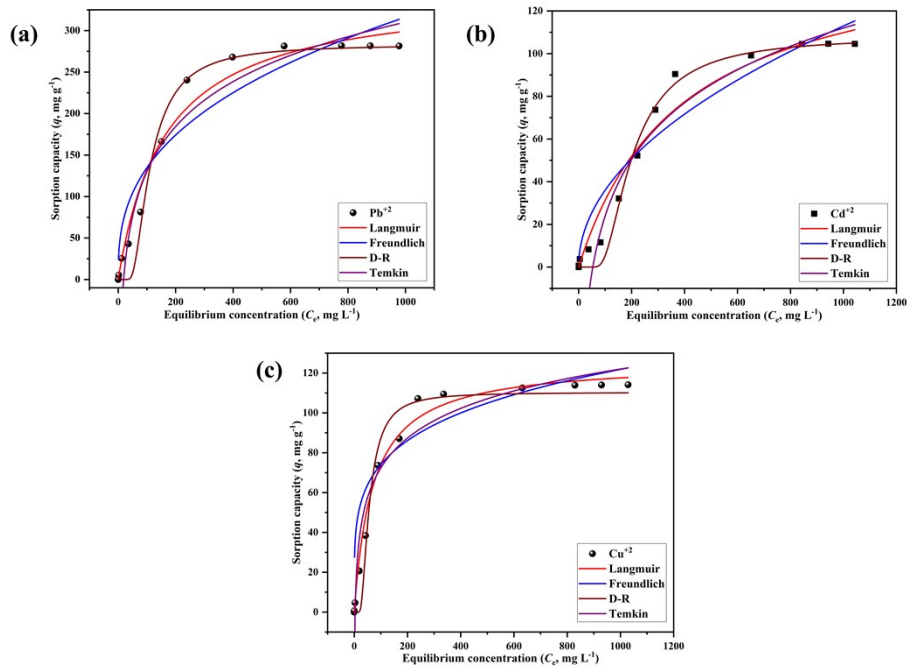

**Fig. S2** Applicability of isotherm models for the sorption of (a) Pb<sup>2+</sup>, (b) Cd<sup>2+</sup>, and (c) Cu<sup>2+</sup> ions using Ca-MOF-CB.

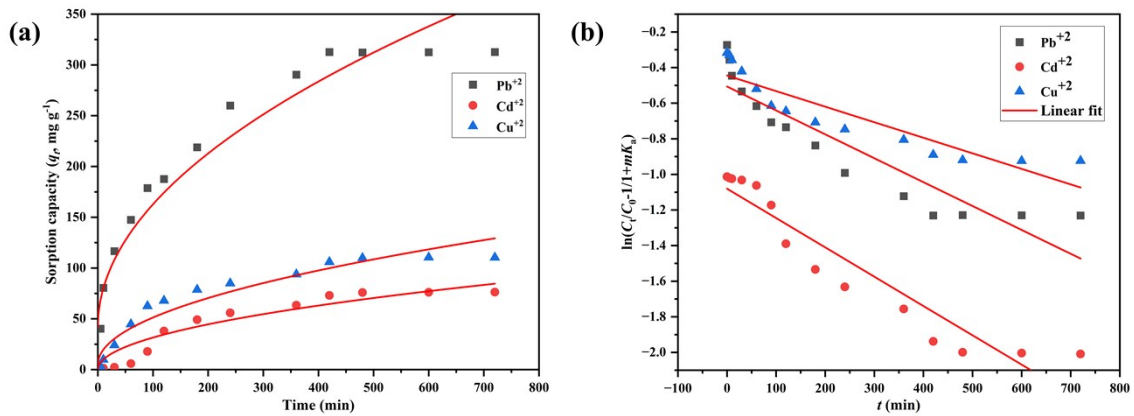

**Fig. S3** Plots determining kinetic parameters of (a) intra-particle diffusion and (b) external film diffusion.

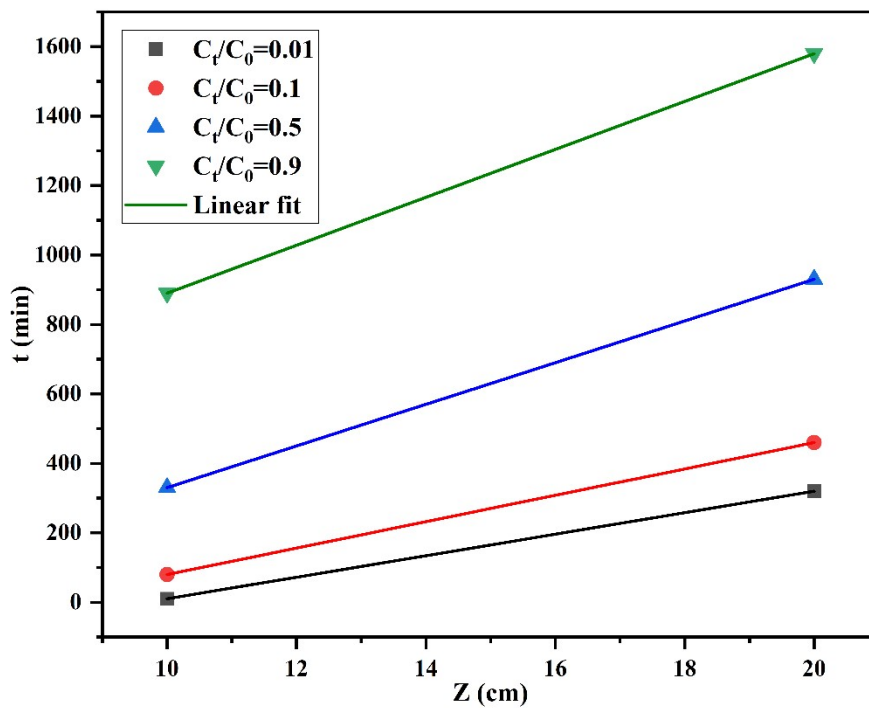

Fig. S4 Applicability of the BDST model to the experimental run.
